# Supplementary material for: Process design and validation of a new mixed eluent for leaching Cd, Cr, Pb, Cu, Ni, and Zn from heavy metal-polluted soil
Source: Royal Society of Chemistry journal article supplement (doi:10.1039/d0ay01978j), 2021-01-01
Supplement: d0ay01978j1.pdf [file d0ay01978j1.pdf]

## **Supplementary Information**

### **Process Design and Validation of A New Mixed Eluent for Leaching Cd, Cr, Pb, Cu, Ni and Zn from Heavy Metal Polluted Soil**

Yuyan Zhao, Han Li, Bing Li, Yawen Lai, Libin Zang, Xiaodan Tang\*

College of Geo-exploration Science and Technology, Jilin University, Changchun 130026, China

\*Corresponding author.

E-mail: tangxiaodan@jlu.edu.cn

**Table S1** Operating parameters of ICP-MS and FTIRS

| Parameter                  | Setting                     |
|----------------------------|-----------------------------|
| ICP-MS                     |                             |
| ICP power                  | 1150 W                      |
| Sampling cone aperture     | 1.2 mm                      |
| Cooling air flow           | 18 L/min                    |
| Intercepting cone aperture | 1.0 mm                      |
| Auxiliary gas flow rate    | 1.2 L/min                   |
| Number of scans            | 20 times                    |
| Atomization gas flow rate  | 0.92 L/min                  |
| Measuring time             | 60 S                        |
| FTIRS                      |                             |
| wave-number range          | 4000 ~ 400 $\text{cm}^{-1}$ |
| spectral resolution        | 0.4 $\text{cm}^{-1}$        |
| wave number precision      | 0.01 $\text{cm}^{-1}$       |

**Table S2** Heating program of microwave digestion

| Step | Heating-up time (min) | Target temperature (°C) | Retention time (min) | Pressure(MPa) |
|------|-----------------------|-------------------------|----------------------|---------------|
| 1    | 5                     | 120                     | 2                    | 1.5           |
| 2    | 4                     | 150                     | 5                    | 2.0           |
| 3    | 5                     | 185                     | 40                   | 2.0           |

**Table S3** Summary for the measurement results of Cd, Cr, Cu, Ni, Pb and Zn in standard solutions

| Element | Concentration ( $\mu\text{g/mL}$ ) | Linear range ( $\mu\text{g/mL}$ ) | Linear equation      | R      |
|---------|------------------------------------|-----------------------------------|----------------------|--------|
| Cd      | 0.000, 0.500, 2.000, 5.000, 20.000 | 0.000-20.000                      | $y=69.022x$          | 0.9999 |
| Cr      | 0.000, 0.500, 2.000, 5.000, 20.000 | 0.000-20.000                      | $y=351.230x+3410.22$ | 0.9998 |
| Pb      | 0.000, 0.500, 2.000, 5.000, 20.000 | 0.000-20.000                      | $y=358.274x$         | 0.9997 |
| Cu      | 0.000, 0.500, 1.000, 2.000, 5.000  | 0.000-5.000                       | $y=141.813x$         | 0.9999 |
| Zn      | 0.000, 0.500, 1.000, 2.000, 5.000  | 0.000-5.000                       | $y=256.598x$         | 0.9998 |
| Ni      | 0.000, 0.500, 1.000, 2.000, 5.000  | 0.000-5.000                       | $y=69.022x$          | 0.9999 |

R: correlation coefficient.

**Table S4** Detection limit of ICP-MS method

| Element | Cd<br>( $\mu\text{g/g}$ ) | Cr<br>( $\mu\text{g/g}$ ) | Pb<br>( $\mu\text{g/g}$ ) | Cu<br>( $\mu\text{g/g}$ ) | Ni<br>( $\mu\text{g/g}$ ) | Zn<br>( $\mu\text{g/g}$ ) |
|---------|---------------------------|---------------------------|---------------------------|---------------------------|---------------------------|---------------------------|
| C1      | 0.0013                    | 0.0221                    | 0.0739                    | 0.0208                    | 0.0035                    | 0.0272                    |
| C2      | 0.0022                    | 0.0214                    | 0.0756                    | 0.0147                    | 0.0031                    | 0.0274                    |
| C3      | 0.0013                    | 0.0221                    | 0.0765                    | 0.0344                    | 0.0033                    | 0.0225                    |
| C4      | 0.0007                    | 0.0196                    | 0.0910                    | 0.0287                    | 0.0064                    | 0.0258                    |
| C5      | 0.0035                    | 0.0151                    | 0.0893                    | 0.0249                    | 0.0029                    | 0.0168                    |
| C6      | 0.0158                    | 0.0232                    | 0.0813                    | 0.0313                    | 0.0041                    | 0.0209                    |
| C7      | 0.0017                    | 0.0207                    | 0.0588                    | 0.0184                    | 0.0058                    | 0.0292                    |
| C8      | 0.0029                    | 0.0243                    | 0.0611                    | 0.0432                    | 0.0058                    | 0.0024                    |
| C9      | 0.0011                    | 0.0215                    | 0.0392                    | 0.0375                    | 0.0044                    | 0.0237                    |
| C10     | 0.0012                    | 0.0219                    | 0.0809                    | 0.0481                    | 0.0083                    | 0.0336                    |
| C11     | 0.0021                    | 0.0239                    | 0.0304                    | 0.0304                    | 0.0036                    | 0.0166                    |
| C12     | 0.0287                    | 0.0247                    | 0.0686                    | 0.0338                    | 0.0094                    | 0.0332                    |
| Average | 0.0052                    | 0.0217                    | 0.0689                    | 0.0305                    | 0.0051                    | 0.0233                    |
| SD      | 0.0085                    | 0.0026                    | 0.0187                    | 0.0099                    | 0.0021                    | 0.0087                    |
| DL      | 0.0254                    | 0.0077                    | 0.0562                    | 0.0296                    | 0.0064                    | 0.0257                    |

SD: standard deviation of the blank; DL: detection limit, which is estimated as three times standard deviation of the blank.

**Table S5** Determination of soil pH

| Soil sample number | 1    | 2    | 3    | 4    | 5    | 6    | 7    | 8    | 9    | 10   |
|--------------------|------|------|------|------|------|------|------|------|------|------|
| pH                 | 8.36 | 8.35 | 8.35 | 8.36 | 8.36 | 8.37 | 8.36 | 8.37 | 8.36 | 8.36 |
| Average            |      |      |      |      | 8.36 |      |      |      |      |      |
| SD                 |      |      |      |      | 0.01 |      |      |      |      |      |
| RSD (%)            |      |      |      |      | 0.08 |      |      |      |      |      |

**Table S6** Leaching rates of heavy metals by different chelating agents

| Eluent           | Cd                             |                   | Cr                             |                   | Pb                             |                   | Cu                             |                   | Ni                             |                   | Zn                             |                   |
|------------------|--------------------------------|-------------------|--------------------------------|-------------------|--------------------------------|-------------------|--------------------------------|-------------------|--------------------------------|-------------------|--------------------------------|-------------------|
|                  | Content<br>( $\mu\text{g/g}$ ) | Efficiency<br>(%) |
| 0.050 mol/L EDDS | 0.86 $\pm$<br>0.05             | 19.39             | 2.08 $\pm$<br>0.02             | 6.23              | 409.31 $\pm$<br>0.32           | 23.34             | 53.00 $\pm$<br>0.32            | 26.90             | 0.06 $\pm$<br>0.10             | 0.30              | 93.70 $\pm$<br>0.10            | 11.71             |
| 0.040 mol/L EDTA | 0.88 $\pm$<br>0.18             | 19.80             | 2.24 $\pm$<br>0.74             | 6.73              | 371.31 $\pm$<br>0.81           | 21.24             | 47.50 $\pm$<br>0.83            | 24.11             | 0.48 $\pm$<br>0.94             | 2.40              | 95.74 $\pm$<br>0.30            | 11.96             |
| 0.005 mol/L DTPA | 0.98 $\pm$<br>0.03             | 22.11             | 1.23 $\pm$<br>0.17             | 3.70              | 442.80 $\pm$<br>0.91           | 25.31             | 51.51 $\pm$<br>0.56            | 26.14             | 0.90 $\pm$<br>0.76             | 4.55              | 97.20 $\pm$<br>0.13            | 12.15             |
| 0.050 mol/L GLDA | 0.05 $\pm$<br>0.02             | 1.05              | 0.00 $\pm$<br>0.00             | 0.00              | 14.30 $\pm$<br>0.09            | 0.88              | 25.03 $\pm$<br>0.32            | 12.69             | 0.05 $\pm$<br>0.01             | 0.25              | 18.24 $\pm$<br>0.01            | 2.27              |
| 0.100 mol/L PASP | 0.31 $\pm$<br>0.05             | 7.07              | 0.43 $\pm$<br>0.02             | 1.29              | 38.34 $\pm$<br>0.40            | 2.25              | 38.50 $\pm$<br>0.80            | 19.54             | 0.30 $\pm$<br>0.57             | 1.52              | 49.67 $\pm$<br>0.02            | 6.20              |
| 0.060 mol/L SDBS | 0.00 $\pm$<br>0.00             | 0.00              | 0.17 $\pm$<br>0.12             | 0.52              | 2.43 $\pm$<br>0.21             | 0.20              | 4.50 $\pm$<br>0.29             | 1.79              | 0.01 $\pm$<br>0.01             | 0.05              | 6.77 $\pm$<br>0.03             | 0.84              |
| 0.010 mol/L IDS  | 0.30 $\pm$<br>0.01             | 6.73              | 0.01 $\pm$<br>0.02             | 0.03              | 127.3 $\pm$<br>0.40            | 7.33              | 37.52 $\pm$<br>0.23            | 19.03             | 1.60 $\pm$<br>0.31             | 8.08              | 58.73 $\pm$<br>0.20            | 7.34              |
| 0.010 mol/L STPP | 1.04 $\pm$<br>0.04             | 23.32             | 3.88 $\pm$<br>0.14             | 11.64             | 234.31 $\pm$<br>0.37           | 13.43             | 16.51 $\pm$<br>0.82            | 8.37              | 0.00 $\pm$<br>0.00             | 0.00              | 87.75 $\pm$<br>0.01            | 10.96             |

Note: The concentration of each chelating agent is the best content selected from previous reports. The solution pH value is 6.50, the liquid-solid ratio is 10:1, the oscillation rate is 100 rpm, the oscillation time is 12 h, and the centrifugation time is 40 min.

**Table S7** Leaching efficiency of EDDS for heavy metals under different concentrations

| Concentration<br>(mol/L) | Cd                             |                   | Cr                             |                   | Pb                             |                   | Cu                             |                   | Ni                             |                   | Zn                             |                   |
|--------------------------|--------------------------------|-------------------|--------------------------------|-------------------|--------------------------------|-------------------|--------------------------------|-------------------|--------------------------------|-------------------|--------------------------------|-------------------|
|                          | Content<br>( $\mu\text{g/g}$ ) | Efficiency<br>(%) |
| 0.010                    | $0.54 \pm 0.04$                | 12.19             | $0.14 \pm 0.03$                | 0.42              | $89.34 \pm 0.98$               | 5.10              | $30.46 \pm 0.13$               | 15.46             | $0.94 \pm 0.17$                | 4.75              | $22.27 \pm 0.04$               | 2.85              |
| 0.030                    | $0.91 \pm 0.01$                | 20.52             | $2.10 \pm 0.02$                | 6.29              | $449.87 \pm 0.48$              | 25.65             | $40.81 \pm 0.63$               | 21.22             | $1.71 \pm 0.03$                | 8.65              | $35.97 \pm 0.56$               | 4.51              |
| 0.050                    | $0.86 \pm 0.05$                | 19.39             | $2.08 \pm 0.02$                | 6.23              | $409.31 \pm 0.32$              | 23.34             | $53.00 \pm 0.32$               | 26.90             | $0.06 \pm 0.10$                | 0.30              | $93.70 \pm 0.10$               | 11.71             |
| 0.060                    | $0.91 \pm 0.03$                | 20.41             | $2.09 \pm 0.58$                | 6.26              | $417.47 \pm 0.40$              | 23.81             | $31.63 \pm 0.47$               | 16.06             | $1.12 \pm 0.11$                | 5.63              | $24.30 \pm 0.30$               | 3.04              |
| 0.070                    | $1.24 \pm 0.06$                | 27.89             | $4.90 \pm 0.05$                | 14.70             | $519.42 \pm 0.25$              | 29.62             | $38.55 \pm 0.32$               | 19.56             | $1.95 \pm 0.23$                | 9.85              | $43.87 \pm 0.05$               | 5.49              |
| 0.080                    | $0.81 \pm 0.03$                | 18.29             | $2.58 \pm 0.21$                | 7.76              | $350.94 \pm 0.85$              | 20.01             | $31.22 \pm 0.23$               | 15.82             | $1.10 \pm 0.06$                | 5.55              | $24.71 \pm 0.50$               | 3.09              |
| 0.090                    | $0.86 \pm 0.01$                | 19.46             | $3.27 \pm 0.48$                | 9.83              | $416.53 \pm 0.18$              | 23.75             | $34.92 \pm 0.18$               | 17.72             | $1.38 \pm 0.16$                | 6.96              | $28.43 \pm 0.09$               | 3.56              |
| 0.100                    | $0.98 \pm 0.08$                | 22.14             | $3.84 \pm 0.22$                | 11.52             | $464.85 \pm 0.53$              | 26.51             | $41.70 \pm 0.29$               | 21.17             | $1.82 \pm 0.10$                | 9.17              | $33.34 \pm 0.40$               | 4.17              |

Note: The liquid-solid ratio was 10:1, the oscillation rate was 100 rpm, the oscillation time was 12 h, and the centrifugation time was 40 min. The pH is 6.50.



**Table S8** Leaching effect of heavy metal elements by FeCl<sub>3</sub>

| Eluent            | Content(mol/L) | Cd                             |                   | Pb                             |                   |
|-------------------|----------------|--------------------------------|-------------------|--------------------------------|-------------------|
|                   |                | Content<br>( $\mu\text{g/g}$ ) | Efficiency<br>(%) | Content<br>( $\mu\text{g/g}$ ) | Efficiency<br>(%) |
| FeCl <sub>3</sub> | 0.010          | 0.29 $\pm$ 4.00                | 6.59              | 64.90 $\pm$ 2.44               | 3.70              |
|                   | 0.050          | 0.76 $\pm$ 2.28                | 17.05             | 444.46 $\pm$ 0.23              | 25.34             |
|                   | 0.100          | 3.21 $\pm$ 0.62                | 68.05             | 666.70 $\pm$ 1.43              | 38.01             |
|                   | 0.150          | 4.13 $\pm$ 1.29                | 93.05             | 629.69 $\pm$ 0.74              | 35.90             |
|                   | 0.200          | 0.73 $\pm$ 1.83                | 16.48             | 652.84 $\pm$ 0.96              | 37.22             |

Note: The liquid-solid ratio was 10:1, the oscillation rate was 100 rpm, the oscillation time was 12 h, and the centrifugation time was 40 min in the experiment. The pH is the original pH.

**Table S9** Leaching efficiency of EDDS for heavy metals under different pH conditions

| pH    | Cd                             |                   | Cr                             |                   | Pb                             |                   | Cu                             |                   | Ni                             |                   | Zn                             |                   |
|-------|--------------------------------|-------------------|--------------------------------|-------------------|--------------------------------|-------------------|--------------------------------|-------------------|--------------------------------|-------------------|--------------------------------|-------------------|
|       | Content<br>( $\mu\text{g/g}$ ) | Efficiency<br>(%) |
| 1.50  | 1.24 $\pm$                     | 28.03             | 3.18 $\pm$                     | 9.55              | 222.67 $\pm$                   | 12.69             | 33.11 $\pm$                    | 16.81             | 1.77 $\pm$                     | 8.94              | 31.86 $\pm$                    | 3.98              |
|       | 0.15                           |                   | 0.49                           |                   | 0.94                           |                   | 0.51                           |                   | 0.36                           |                   | 0.77                           |                   |
| 2.50  | 0.87 $\pm$                     | 19.59             | 2.22 $\pm$                     | 6.67              | 66.19 $\pm$                    | 3.77              | 29.97 $\pm$                    | 15.21             | 1.57 $\pm$                     | 7.91              | 25.23 $\pm$                    | 3.15              |
|       | 0.01                           |                   | 0.12                           |                   | 0.04                           |                   | 0.07                           |                   | 0.03                           |                   | 0.31                           |                   |
| 3.50  | 0.78 $\pm$                     | 17.62             | 2.52 $\pm$                     | 7.58              | 70.68 $\pm$                    | 4.03              | 33.67 $\pm$                    | 17.09             | 1.68 $\pm$                     | 8.50              | 27.56 $\pm$                    | 3.45              |
|       | 0.19                           |                   | 0.47                           |                   | 0.51                           |                   | 0.36                           |                   | 0.26                           |                   | 0.22                           |                   |
| 4.50  | 0.72 $\pm$                     | 16.11             | 2.60 $\pm$                     | 7.82              | 306.59 $\pm$                   | 17.48             | 26.73 $\pm$                    | 13.57             | 1.24 $\pm$                     | 6.27              | 22.39 $\pm$                    | 2.80              |
|       | 0.14                           |                   | 0.32                           |                   | 0.50                           |                   | 1.00                           |                   | 0.18                           |                   | 0.78                           |                   |
| 5.50  | 0.97 $\pm$                     | 21.88             | 2.94 $\pm$                     | 8.82              | 413.54 $\pm$                   | 23.58             | 32.31 $\pm$                    | 16.40             | 1.41 $\pm$                     | 7.11              | 24.16 $\pm$                    | 3.02              |
|       | 0.19                           |                   | 0.17                           |                   | 1.61                           |                   | 0.26                           |                   | 0.37                           |                   | 0.43                           |                   |
| 6.50  | 0.86 $\pm$                     | 19.39             | 2.08 $\pm$                     | 6.23              | 409.31 $\pm$                   | 23.34             | 53.00 $\pm$                    | 26.90             | 0.06 $\pm$                     | 0.30              | 93.70 $\pm$                    | 11.71             |
|       | 0.05                           |                   | 0.02                           |                   | 0.32                           |                   | 0.32                           |                   | 0.10                           |                   | 0.10                           |                   |
| 7.50  | 0.92 $\pm$                     | 20.78             | 2.49 $\pm$                     | 7.47              | 385.56 $\pm$                   | 21.98             | 32.36 $\pm$                    | 16.43             | 1.36 $\pm$                     | 6.89              | 22.64 $\pm$                    | 2.83              |
|       | 0.20                           |                   | 0.25                           |                   | 0.56                           |                   | 0.58                           |                   | 0.02                           |                   | 0.10                           |                   |
| 8.50  | 0.84 $\pm$                     | 18.99             | 2.57 $\pm$                     | 7.71              | 382.41 $\pm$                   | 21.80             | 33.18 $\pm$                    | 16.84             | 1.33 $\pm$                     | 6.69              | 21.92 $\pm$                    | 2.74              |
|       | 0.07                           |                   | 0.12                           |                   | 0.88                           |                   | 0.15                           |                   | 0.09                           |                   | 1.08                           |                   |
| 9.50  | 0.90 $\pm$                     | 20.32             | 2.63 $\pm$                     | 7.91              | 391.40 $\pm$                   | 22.31             | 35.27 $\pm$                    | 17.90             | 1.41 $\pm$                     | 7.11              | 22.49 $\pm$                    | 2.81              |
|       | 0.08                           |                   | 0.01                           |                   | 0.74                           |                   | 0.66                           |                   | 0.07                           |                   | 0.44                           |                   |
| 10.50 | 0.94 $\pm$                     | 21.23             | 2.73 $\pm$                     | 8.19              | 399.85 $\pm$                   | 22.80             | 36.40 $\pm$                    | 18.48             | 1.46 $\pm$                     | 7.36              | 22.22 $\pm$                    | 2.78              |
|       | 0.11                           |                   | 0.08                           |                   | 0.06                           |                   | 0.58                           |                   | 2.23                           |                   | 0.07                           |                   |

Note: The concentration of EDDS was 0.050 mol/L, the liquid-solid ratio was 10:1, the oscillation rate was 100 rpm, the oscillation time was 12 h, and the centrifugation time was 40 min.

**Table S10** Leaching efficiency of the mixed eluent EDDS and FeCl<sub>3</sub>

| m <sub>EDDS</sub> : m <sub>FeCl<sub>3</sub></sub> | Cd             |                | Cr             |                | Pb             |                | Cu             |                | Ni             |                | Zn             |                | pH       |    |
|---------------------------------------------------|----------------|----------------|----------------|----------------|----------------|----------------|----------------|----------------|----------------|----------------|----------------|----------------|----------|----|
|                                                   | Content (µg/g) | Efficiency (%) |          |    |
| 1:5                                               | 2.04±          | 46.25          | 3.56±          | 10.72          | 411.14±        | 23.44          | 32.11±         | 16.27          | 0.44±          | 2.23           | 8.73±          | 1.09           | Original |    |
|                                                   | 0.52           |                | 0.29           |                | 0.39           |                | 0.37           |                | 0.13           |                | 0.11           |                |          |    |
| 3:5                                               | 2.54±          | 57.64          | 3.14±          | 9.43           | 243.11±        | 13.86          | 22.99±         | 11.65          | 0.14±          | 0.69           | 15.69±         | 1.96           |          |    |
|                                                   | 0.42           |                | 0.13           |                | 0.21           |                | 0.16           |                | 0.20           |                | 0.13           |                |          |    |
| 1:1                                               | 2.12±          | 47.79          | 6.01±          | 18.03          | 460.61±        | 26.26          | 50.78±         | 25.73          | 4.85±          | 24.55          | 22.82±         | 2.85           |          | pH |
|                                                   | 0.42           |                | 0.35           |                | 0.25           |                | 0.22           |                | 0.25           |                | 0.19           |                |          |    |
| 9:5                                               | 02.41±         | 54.88          | 4.79±          | 14.35          | 435.17±        | 24.81          | 31.68±         | 16.05          | 0.23±          | 1.14           | 16.65±         | 2.08           |          |    |
|                                                   | 0.47           |                | 0.26           |                | 0.40           |                | 0.27           |                | 0.19           |                | 0.29           |                |          |    |
| 21:5                                              | 2.83±          | 64.29          | 3.59±          | 10.75          | 404.30±        | 23.05          | 50.23±         | 25.45          | 3.36±          | 16.95          | 33.07±         | 4.13           |          |    |
|                                                   | 0.51           |                | 0.22           |                | 0.32           |                | 0.21           |                | 0.16           |                | 0.06           |                |          |    |
| 1:5                                               | 3.17±          | 71.36          | 4.08±          | 12.25          | 431.75±        | 24.62          | 36.93±         | 18.74          | 0.41±          | 2.07           | 13.44±         | 1.68           | 1.30     |    |
|                                                   | 0.64           |                | 0.36           |                | 0.42           |                | 0.31           |                | 0.28           |                | 0.11           |                |          |    |
| 3:5                                               | 3.10±          | 69.80          | 3.43±          | 10.29          | 398.52±        | 22.72          | 28.22±         | 14.32          | 0.24±          | 1.20           | 16.19±         | 2.02           |          |    |
|                                                   | 0.47           |                | 0.26           |                | 0.37           |                | 0.29           |                | 0.07           |                | 0.15           |                |          |    |
| 1:1                                               | 3.02±          | 67.97          | 7.09±          | 21.29          | 513.93±        | 29.30          | 56.87±         | 28.87          | 6.74±          | 34.05          | 35.21±         | 4.40           |          |    |
|                                                   | 0.62           |                | 0.30           |                | 0.35           |                | 0.35           |                | 0.47           |                | 0.14           |                |          |    |
| 9:5                                               | 3.16±          | 71.25          | 6.12±          | 18.38          | 550.92±        | 31.41          | 32.93±         | 16.72          | 0.27±          | 1.35           | 20.42±         | 2.55           |          |    |
|                                                   | 0.64           |                | 0.32           |                | 0.23           |                | 0.12           |                | 0.14           |                | 0.19           |                |          |    |
| 21:5                                              | 3.11±          | 69.97          | 4.56±          | 13.71          | 506.26±        | 28.86          | 50.48±         | 25.63          | 3.53±          | 17.80          | 36.24±         | 4.53           |          |    |
|                                                   | 0.64           |                | 0.30           |                | 0.36           |                | 0.35           |                | 0.23           |                | 0.19           |                |          |    |

|      |               |       |               |      |                 |       |                |       |               |       |                |      |      |
|------|---------------|-------|---------------|------|-----------------|-------|----------------|-------|---------------|-------|----------------|------|------|
| 1:5  | 1.56±<br>0.58 | 35.13 | 0.02±<br>0.03 | 0.06 | 80.33±<br>0.25  | 4.58  | 52.39±<br>0.45 | 26.59 | 4.49±<br>0.43 | 22.66 | 35.95±<br>0.17 | 4.49 |      |
| 3:5  | 2.11±<br>0.44 | 47.61 | 3.43±<br>0.01 | 0.19 | 113.82±<br>0.17 | 6.49  | 49.76±<br>0.24 | 25.26 | 3.43±<br>0.20 | 17.32 | 33.23±<br>0.15 | 4.15 |      |
| 1:1  | 1.21±<br>0.43 | 27.15 | 0.07±<br>0.23 | 0.22 | 79.05±<br>0.22  | 4.51  | 33.96±<br>0.31 | 17.24 | 3.07±<br>0.27 | 15.49 | 15.58±<br>0.52 | 1.95 | 6.50 |
| 9:5  | 1.89±<br>0.55 | 42.65 | 0.38±<br>0.11 | 1.15 | 129.92±<br>0.23 | 7.41  | 59.60±<br>0.53 | 30.25 | 5.74±<br>0.24 | 29.00 | 39.66±<br>0.19 | 4.96 |      |
| 21:5 | 2.56±<br>0.52 | 57.72 | 0.27±<br>0.13 | 0.81 | 313.15±<br>0.27 | 17.85 | 46.92±<br>0.38 | 23.81 | 2.48±<br>0.21 | 12.52 | 23.21±<br>0.06 | 2.90 |      |
| 1:5  | 0.04±<br>0.06 | 0.97  | 0.23±<br>0.09 | 0.69 | 127.67±<br>0.15 | 7.28  | 35.05±<br>0.31 | 17.77 | 2.18±<br>0.19 | 11.00 | 17.54±<br>0.23 | 2.19 |      |
| 3:5  | 0.06±<br>0.19 | 1.33  | 0.67±<br>0.27 | 2.01 | 359.70±<br>0.37 | 20.51 | 38.93±<br>0.19 | 19.76 | 1.90±<br>0.26 | 9.61  | 21.57±<br>0.30 | 2.70 |      |
| 1:1  | 1.94±<br>0.50 | 43.72 | 0.25±<br>0.12 | 0.74 | 191.61±<br>0.30 | 10.92 | 46.92±<br>0.36 | 23.82 | 3.63±<br>0.15 | 18.34 | 17.01±<br>0.16 | 2.13 | 8.50 |
| 9:5  | 0.74±<br>0.34 | 16.70 | 0.72±<br>0.35 | 2.17 | 498.40±<br>0.37 | 28.42 | 42.98±<br>0.45 | 21.82 | 2.96±<br>0.23 | 14.96 | 19.98±<br>0.13 | 2.50 |      |
| 21:5 | 2.38±<br>0.50 | 53.60 | 0.35±<br>0.06 | 1.04 | 328.03±<br>0.29 | 18.70 | 46.33±<br>0.37 | 23.52 | 2.10±<br>0.23 | 10.62 | 23.26±<br>0.16 | 2.91 |      |

Note:  $m_{\text{EDDS}}: m_{\text{FeCl}_3}$  is the mass ratio of EDDS and  $\text{FeCl}_3$ . The concentration of EDDS was 0.050 mol/L, the concentration of  $\text{FeCl}_3$  was 0.150 mol/L, the liquid-solid ratio was 10:1, the oscillation rate was 100 rpm, the oscillation time was 12 h, and the centrifugation time was 40 min.

**Table S11** Physical and chemical properties of soil before and after leaching.

| Characteristics | Original soil  | Soil after EDDS+ FeCl <sub>3</sub> leaching |                |                |                |                |                |                |                |                |                |                |                |                |                |                | Soil after FeCl <sub>3</sub> leaching |
|-----------------|----------------|---------------------------------------------|----------------|----------------|----------------|----------------|----------------|----------------|----------------|----------------|----------------|----------------|----------------|----------------|----------------|----------------|---------------------------------------|
|                 |                | pH=1.30                                     |                |                |                |                | pH=6.50        |                |                |                |                | pH=8.50        |                |                |                |                |                                       |
|                 |                | 1:5                                         | 3:5            | 1:1            | 9:5            | 21:5           | 1:5            | 3:5            | 1:1            | 9:5            | 21:5           | 1:5            | 3:5            | 1:1            | 9:5            | 21:5           |                                       |
| pH              | 8.36±<br>0.01  | 4.32±<br>0.01                               | 4.35±<br>0.01  | 4.56±<br>0.01  | 4.74±<br>0.01  | 4.94±<br>0.01  | 5.51±<br>0.01  | 5.63±<br>0.01  | 6.25±<br>0.01  | 6.67±<br>0.01  | 6.79±<br>0.01  | 8.38±<br>0.01  | 8.64±<br>0.01  | 8.89±<br>0.01  | 8.94±<br>0.01  | 8.91±<br>0.01  | 3.37 ± 0.01                           |
| SOM (%)         | 5.02±<br>0.04  | 2.24±<br>0.01                               | 2.26±<br>0.01  | 2.28±<br>0.02  | 2.25±<br>0.01  | 2.27±<br>0.02  | 2.45±<br>0.02  | 2.66±<br>0.02  | 2.64±<br>0.01  | 2.81±<br>0.02  | 3.02±<br>0.04  | 2.43±<br>0.02  | 2.70±<br>0.02  | 2.67±<br>0.02  | 2.89±<br>0.02  | 2.54±<br>0.02  | 2.25 ± 0.16                           |
| N (mg/g)        | 3.47±<br>0.35  | 2.34±<br>0.15                               | 2.38±<br>0.16  | 2.35±<br>0.15  | 2.46±<br>0.15  | 2.44±<br>0.15  | 2.52±<br>0.17  | 2.57±<br>0.15  | 2.49±<br>0.15  | 2.55±<br>0.16  | 2.63±<br>0.15  | 2.68±<br>0.18  | 2.72±<br>0.15  | 2.79±<br>0.19  | 2.90±<br>0.21  | 2.84±<br>0.15  | 2.02 ± 0.08                           |
| P (µg/g)        | 54.40±<br>0.03 | 25.18±<br>0.01                              | 25.23±<br>0.01 | 25.19±<br>0.01 | 25.64±<br>0.01 | 35.88±<br>0.02 | 27.07±<br>0.01 | 36.59±<br>0.03 | 29.48±<br>0.01 | 31.60±<br>0.01 | 38.06±<br>0.02 | 34.38±<br>0.01 | 28.94±<br>0.01 | 48.38±<br>0.03 | 40.25±<br>0.02 | 46.32±<br>0.01 | 22.14 ± 0.02                          |

SOM: soil organic matter; N: Nitrogen; P: Phosphorus.
